# Supplementary material for: Spectral Domain and Angiography Optical Coherence Tomography in Parkinson’s Disease: Structural And Vascular Changes in the Retina Correlate with Disease Severity and Progression
Source: Hindawi journal article supplement (doi:10.1155/2024/8555083), 2024-01-01
Supplement: f1 [file 8555083.f1.docx]

|  | **VD-SCP^** | **VD-DCP^** | **FAZ^^** | **CC^** | **RCP^** | **GCC**§ | **th-RNFL**§ | **SFCT**§ |
| --- | --- | --- | --- | --- | --- | --- | --- | --- |
| **MMSE** | -0.070*/0.745° | -0.203/0.342 | 0.176/0.410 | 0.263/0.214 | -0.009/0.967 | -0-304/0.149 | 0.170/0.426 | 0.127/0.554 |
| **NMSS** | -0.121/0.574 | -0.377/0.070 | -0.285/0.177 | -0.240/0.258 | -0.123/0.556 | 0.370/0.108 | -0.219/0.303 | 0.062/0.774 |
| **HAM-D** | -0.018/0.938 | -0.250/0.273 | -0.183/0.427 | -0.226/0.325 | -0.103/0.658 | 0.343/0.128 | -0.298/0.190 | 0.058/0.802 |
| **KPDPS** | 0.179/0.403 | 0.084/0.697 | -0.105/0.627 | 0.071/0.741 | 0.143/0.505 | 0.215/0.313 | -0.013/0.953 | -0.056/0.797 |
| **FOGQ** | -0.080/0.712 | -0.399/0.054 | -0.207/0.332 | -0.120/0.576 | -0.235/0.269 | 0.334/0.110 | -0.256/0.228 | 0.044/0.838 |
| **RBDSQ** | -0.153/0.475 | -0.200/0.349 | -0.272/0.199 | -0.187/0.381 | -0.398/0.054 | -0.013/0.952 | -0.165/0.442 | -0.034/0.876 |
| **LEDD** | -0.095/0.657 | -0.164/0.443 | -0.016/0.939 | -0-004/0.984 | -0.241/0.256 | -0.292/0.225 | -0.103/0.632 | 0.261/0.217 |

**Supplementary Table**

VD: vascular density; SCP: Superficial Capillary Plexus: DCP: Deep Capillary Plexus; FAZ: foveal avascular zone; CC: Choriocapillaris; RCP: Radial Peripapillary Capillary; GCC: Ganglion Cell Complex; th:-RNFL: thickness of Retinal Nerve Fiber Layer; SFCT: Subfoveal choroidal thickness; ^: %; ^^: mm; §: µm; *: Pearson coefficient; °: p value; MMSE: Mini-Mmental State Examination; NMSS: Non-Motor Symptoms Scale; HAM-D: Hamilton Depression Scale; KPDPS: King's Parkinson Disease Pain Scale; FOGQ: Freezing of Gait Questionnaire; RBDSQ: REM Sleep Behavior Disorder Screening Questionnaire; LEDD: levodopa equivalent daily dose.
